# Supplementary material for: A COVID-19 Pandemic Artificial Intelligence–Based System With Deep Learning Forecasting and Automatic Statistical Data Acquisition: Development and Implementation Study
Source: PubMed Central journal article supplement (PMC8139395; doi:10.2196/27806), 2021-05-20

## Multimedia Appendix 1

**Table S1.** The information of hyperparameters, packages and function code for each model

| Models                                       | Hyperparameter                                                                                                                                                                         | Library Package and Code                                                                                                                                                                                                                                                                                                     |
|----------------------------------------------|----------------------------------------------------------------------------------------------------------------------------------------------------------------------------------------|------------------------------------------------------------------------------------------------------------------------------------------------------------------------------------------------------------------------------------------------------------------------------------------------------------------------------|
| Autoregressive Integrated Moving Average     | Returns best ARIMA model according to either AIC, AICc or BIC value.<br><br>e.g. Greece data<br>order = c(5, 2, 2)<br>seasonal = c(0, 0, 2)<br><br>lambda="auto"<br><br>frequency = 14 | library(forecast)<br>auto.arima(y,...)<br>Arima( y,<br>order = c(0, 0, 0),<br>seasonal = c(0, 0, 0),<br>xreg = NULL,<br>include.mean = TRUE,<br>include.drift = FALSE,<br>include.constant,<br>lambda = model\$lambda,<br>biasadj = FALSE,<br>method = c("CSS-ML", "ML", "CSS"),<br>model = NULL,<br>x = y, ...)             |
| Feedforward Neural Network                   | NNAR(1,1,50)<br>p =1, P = 1, size=50<br><br>maxit=100<br><br>frequency = 14                                                                                                            | library(forecast)<br>nnetar( y,<br>p,<br>P = 1,<br>size,<br>repeats = 20,<br>xreg = NULL,<br>lambda = NULL,<br>model = NULL,<br>subset = NULL,<br>scale.inputs = TRUE,<br>x = y, ...)                                                                                                                                        |
| Multilayer Perceptron Neural Networks (MLPs) | m = frequency = 14<br><br>rep=20<br><br>hd=c(5,5,5)                                                                                                                                    | library(nnfor)<br>mlp(y, m = frequency(y), hd = NULL, reps = 20, comb = c("median", "mean", "mode"), lags = NULL, keep = NULL, difforder = NULL, outplot = c(FALSE, TRUE), sel.lag = c(TRUE, FALSE), allow.det.season = c(TRUE, FALSE), det.type = c("auto", "bin", "trg"), xreg = NULL, xreg.lags = NULL, xreg.keep = NULL, |

---

|               |                                                    |                                                                                                                                                                                                                                                                                                                                                                                                                                                                                                                        |
|---------------|----------------------------------------------------|------------------------------------------------------------------------------------------------------------------------------------------------------------------------------------------------------------------------------------------------------------------------------------------------------------------------------------------------------------------------------------------------------------------------------------------------------------------------------------------------------------------------|
|               |                                                    | hd.auto.type = c("set", "valid", "cv", "elm"), hd.max = NULL, model = NULL, retrain = c(FALSE, TRUE), ...)                                                                                                                                                                                                                                                                                                                                                                                                             |
| Long          | X_shape2 = 1                                       | library(caret)                                                                                                                                                                                                                                                                                                                                                                                                                                                                                                         |
| Short-term    | X_shape3 = 1                                       | library(keras)                                                                                                                                                                                                                                                                                                                                                                                                                                                                                                         |
| Memory (LSTM) | batch_size = 1<br>units = 1<br>scaler = c(0, 3316) | library(tensorflow)<br>dim(x_train) <- c(length(x_train), 1, 1)<br>batch_size = 1<br>units = 1                                                                                                                                                                                                                                                                                                                                                                                                                         |
|               |                                                    | <pre> model &lt;- keras_model_sequential() model%&gt;%   layer_lstm(units, batch_input_shape = c(batch_size, X_shape2, X_shape3), stateful= TRUE)%&gt;%   layer_dense(units = 1)  #Compile the model model %&gt;% compile(   loss = 'mean_squared_error',   optimizer = optimizer_adam( lr= 0.02, decay = 1e-6 ),    metrics = c('accuracy'))  Epochs = 50 for(i in 1:Epochs ){   model %&gt;% fit(x_train, y_train, epochs=1, batch_size=batch_size, verbose=1, shuffle=FALSE)   model %&gt;% reset_states() } </pre> |

---

**Figure S1.** The dynamic heatmap with policy measures for New Zealand

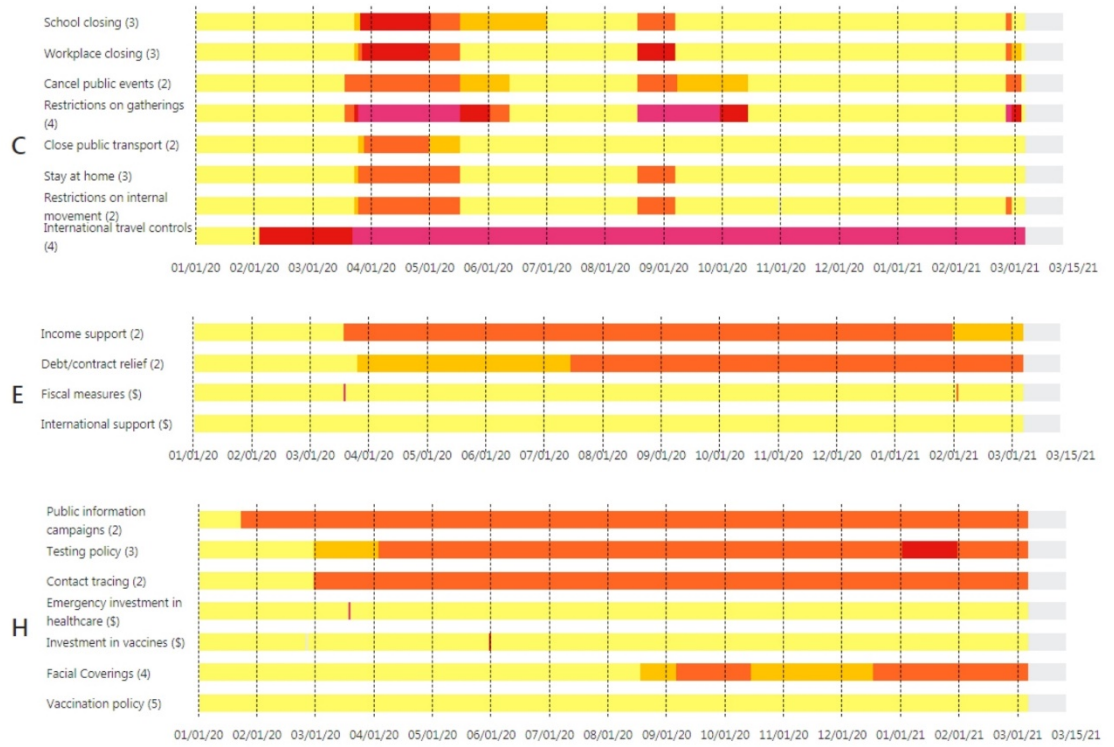

**Figure S2.** The dynamic heatmap with policy measures for Vietnam

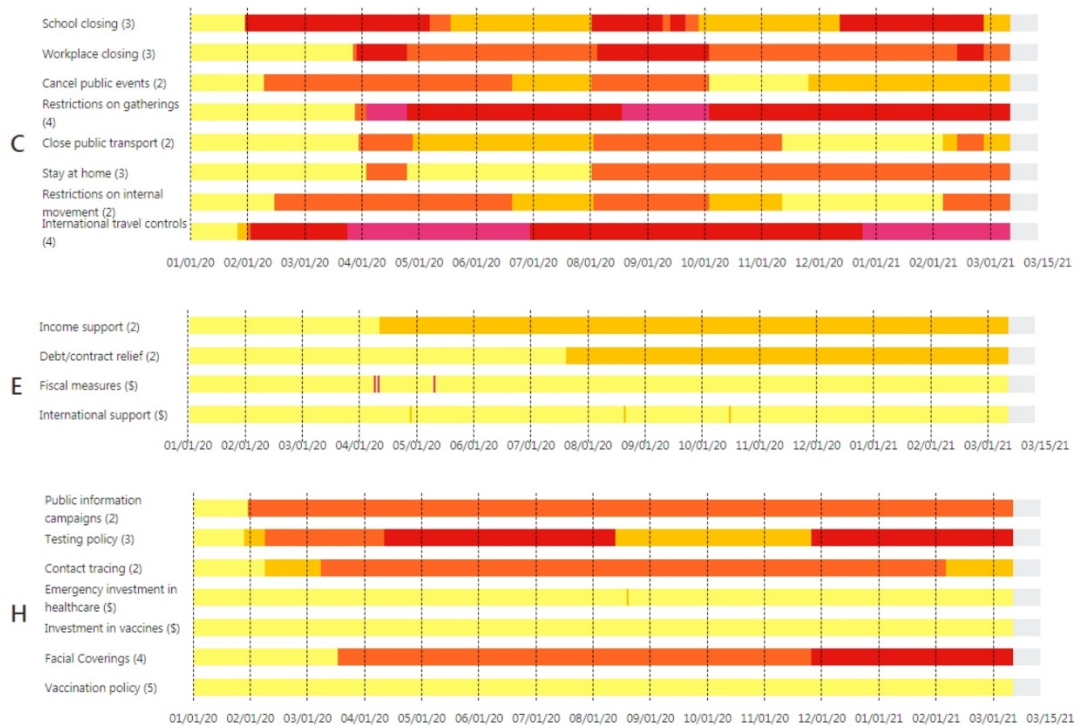

**Figure S3.** The dynamic heatmap with policy measures for Taiwan

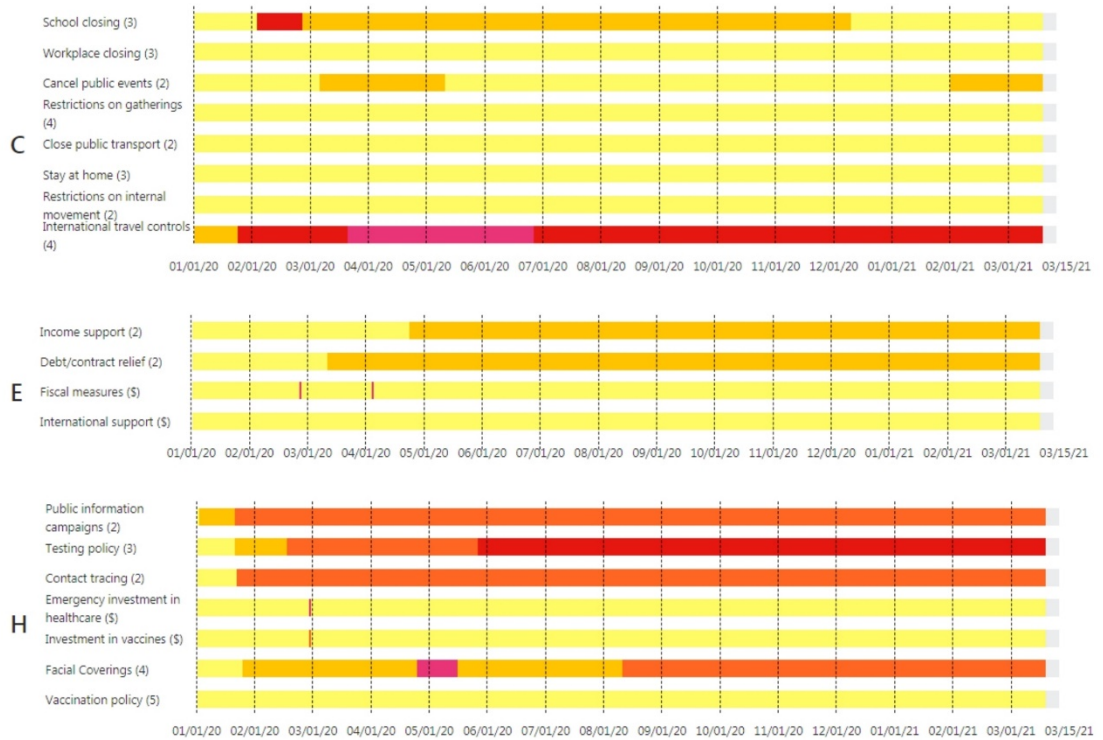

Supplement: jmir_v23i5e27806_app1.pdf [file jmir_v23i5e27806_app1.pdf]
